# Supplementary material for: Unsaturated Fatty Acid Synthesis Is Associated with Worse Survival and Is Differentially Regulated by MYCN and Tumor Suppressor microRNAs in Neuroblastoma
Source: MDPI journal article supplement (doi:10.3390/cancers16081590), 2024-04-21
Supplement: s1 [file s1]

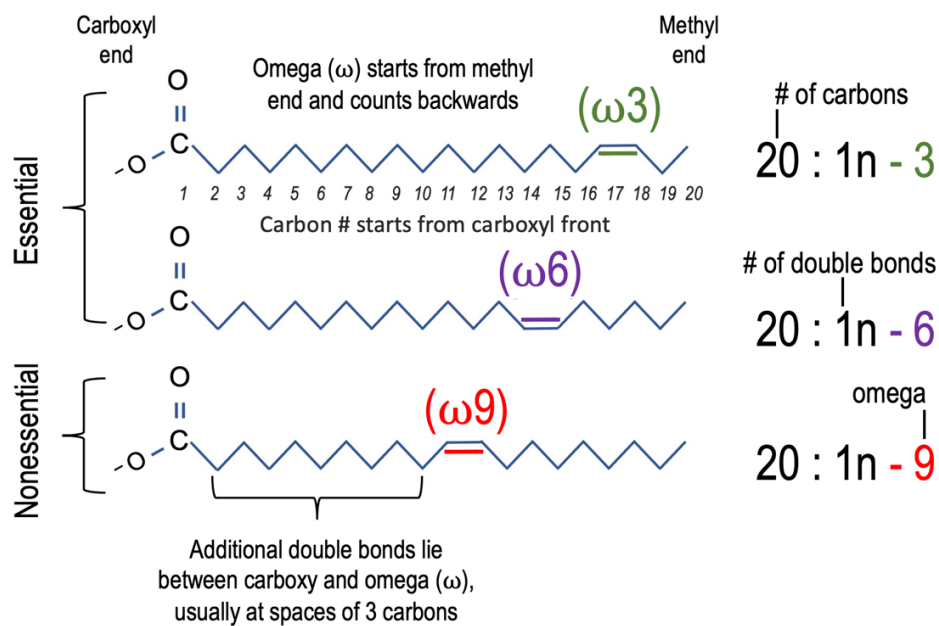

**Supplemental Figure S1. Unsaturated fatty acid structure.** Schematic of  $\omega 3$ ,  $\omega 6$ , and  $\omega 9$  fatty acid structures showing that carbon chains are numbered starting from the carboxy-terminus and that  $\omega$ - double bonds are defined by distance from the terminal methyl group of the opposite end of the carbon chain. Nomenclature starts with number of carbons in the chain followed by a colon, then the total number “n” of double bonds in the chain, followed by a dashed number defining the  $\omega$  class of the fatty acid.

| Structure                             | Common name                   | DB location, ( $\Delta$ ) | Component       |
|---------------------------------------|-------------------------------|---------------------------|-----------------|
| <b>Saturated</b>                      |                               |                           |                 |
| SFA                                   | myristic (MA)                 | —                         | 14:0            |
| SFA                                   | palmitic (PA)                 | —                         | 16:0            |
| SFA                                   | margaric                      | —                         | 17:0            |
| SFA                                   | stearic (SA)                  | —                         | 18:0            |
| SFA                                   | arachidic                     | —                         | 20:0            |
| SFA                                   | behenic                       | —                         | 22:0            |
| SFA                                   | lignoceric                    | —                         | 24:0            |
| <b>Omega-9 (<math>\omega</math>9)</b> |                               |                           |                 |
| MUFA                                  | cis-hexadecenoic              | $\Delta$ 7                | 16:1 $\omega$ 9 |
| MUFA                                  | oleic (OA)                    | $\Delta$ 9                | 18:1 $\omega$ 9 |
| MUFA                                  | gondoic                       | $\Delta$ 11               | 20:1 $\omega$ 9 |
| PUFA                                  | 8,11-eicosadienoic            | $\Delta$ 8,11             | 20:2 $\omega$ 9 |
| HUFA                                  | 5,8,11-eicosatrienoic (Mead)  | $\Delta$ 5,8,11           | 20:3 $\omega$ 9 |
| MUFA                                  | erucic                        | $\Delta$ 13               | 22:1 $\omega$ 9 |
| HUFA                                  | 7,10,13-docosatrienoic (DTrA) | $\Delta$ 7,10,13          | 22:3 $\omega$ 9 |
| MUFA                                  | nervonic                      | $\Delta$ 15               | 24:1 $\omega$ 9 |
| <b>Omega-7 (<math>\omega</math>7)</b> |                               |                           |                 |
| MUFA                                  | palmitoleic                   | $\Delta$ 9                | 16:1 $\omega$ 7 |
| MUFA                                  | asclepic                      | $\Delta$ 11               | 18:1 $\omega$ 7 |
| <b>Omega-6 (<math>\omega</math>6)</b> |                               |                           |                 |
| PUFA                                  | linoleic (LA)                 | $\Delta$ 9,12             | 18:2 $\omega$ 6 |
| HUFA                                  | gamma-linolenic (GLA)         | $\Delta$ 6,9,12           | 18:3 $\omega$ 6 |
| PUFA                                  | 11,14-eicosadienoic           | $\Delta$ 11,14            | 20:2 $\omega$ 6 |
| HUFA                                  | sciadonic                     | $\Delta$ 5,11,14          | 20:3 $\omega$ 6 |
| HUFA                                  | dihomo-gamma-linolenic (DGLA) | $\Delta$ 8,11,14          | 20:3 $\omega$ 6 |
| HUFA                                  | arachidonic (ARA)             | $\Delta$ 5,8,11,14        | 20:4 $\omega$ 6 |
| HUFA                                  | adrenic (AdrA)                | $\Delta$ 7,10,13,16       | 22:4 $\omega$ 6 |
| HUFA                                  | osbond                        | $\Delta$ 4,7,10,13,16     | 22:5 $\omega$ 6 |
| <b>Omega-3 (<math>\omega</math>3)</b> |                               |                           |                 |
| HUFA                                  | alpha-linolenic (ALA)         | $\Delta$ 9,12,15          | 18:3 $\omega$ 3 |
| HUFA                                  | eicosapentaenoic (EPA)        | $\Delta$ 5,8,11,14,17     | 20:5 $\omega$ 3 |
| HUFA                                  | docosapentaenoic (DPA)        | $\Delta$ 7,10,13,16,19    | 22:5 $\omega$ 3 |
| HUFA                                  | docosahexaenoic (DHA)         | $\Delta$ 4,7,10,13,16,19  | 22:6 $\omega$ 3 |

**Supplemental Table S1. List of fatty acids analyzed in this study.** Table showing structure class (SFA = saturated fatty acid; MUFA = monounsaturated fatty acid; PUFA = polyunsaturated fatty acids with two double bonds (DB); HUFA = polyunsaturated fatty acids with three or more DB, common names and abbreviations, location of double bonds (location numbered from carboxy-terminus), and the component nomenclature. The “ $\omega$ 9” and “n-9” notations are interchangeable nomenclatures: e.g., 20:3 $\omega$ 9 = 20:3n-9 = Mead acid.

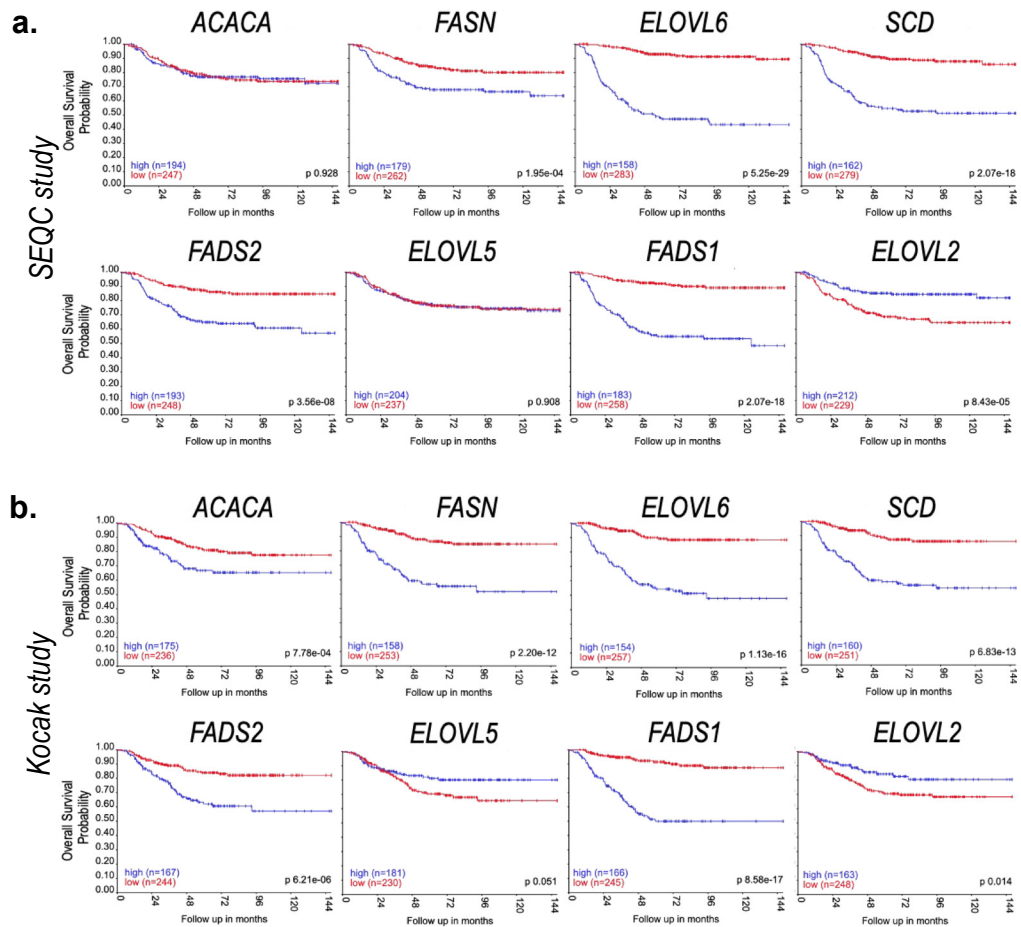

**Supplemental Figure S2: Overall survival of NB patients relative to average U/FAS gene expression.** Kaplan–Meier analysis of overall survival in high vs. low expressing NB patients (Stage 1-4) in the SEQC (n = 441) (**S2a.**) and Kocak (n = 411) (**S2b.**) studies. Significance was calculated using Bonferroni correction. Blue and red lines represent high and low gene expression, respectively. Patient numbers per group are in parentheses. Cut-off for high and low gene expression for Kaplan–Meier analysis was determined by average gene expression.

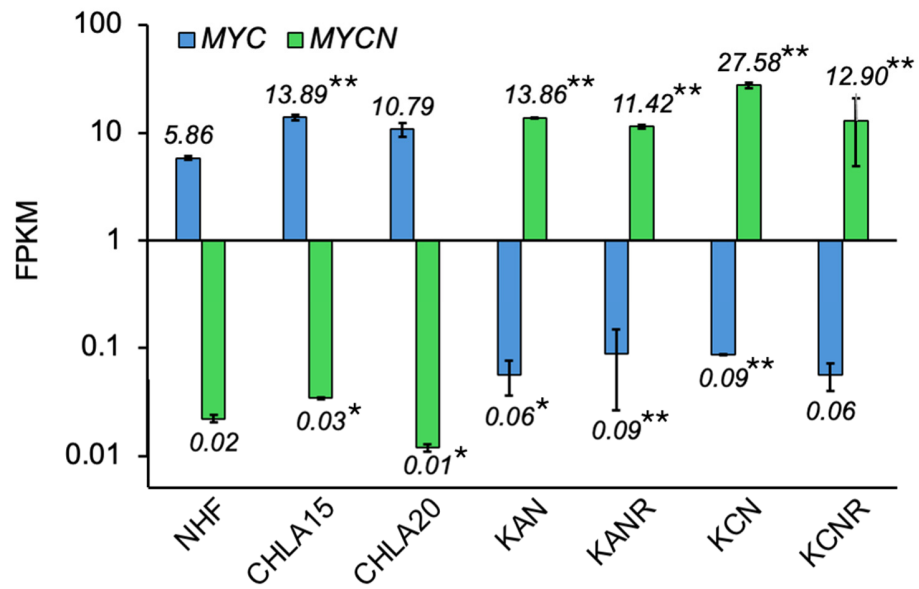

**Supplemental Figure S3.** FPKM gene expression levels of *MYC* and *MYCN* genes in NHF and human NB cell lines. (n = 3 sequencing rounds) Significance determined by t-test, \* $p < 0.05$ , \*\* $p < 0.01$ .

| Sample Name | Cell Type               | Cell Line Designation | Sex    | MYCN Status   | Therapy Phase | Date Established | NB Cell Relationship | Research Resource Identifier (RRID) |
|-------------|-------------------------|-----------------------|--------|---------------|---------------|------------------|----------------------|-------------------------------------|
| NHF         | Normal Human Fibroblast | BJ                    | male   | —             | —             | 2000             | —                    | CVCL_3653                           |
| BE1         | Neuroblastoma           | SK-N-BE(1)            | male   | amplified     | Dx            | 1972             | paired               | CVCL_9898                           |
| BE2         | Neuroblastoma           | SK-N-BE(2)            | male   | amplified     | PD            | 1972             |                      | CVCL_0528                           |
| C15         | Neuroblastoma           | CHLA-15               | female | non-amplified | Dx            | 1988             | paired               | CVCL_6594                           |
| C20         | Neuroblastoma           | CHLA-20               | female | non-amplified | PD            | 1988             |                      | CVCL_6602                           |
| KAN         | Neuroblastoma           | SMS-KAN               | female | amplified     | Dx            | 1978             | paired               | CVCL_7131                           |
| KANR        | Neuroblastoma           | SMS-KANR              | female | amplified     | PD            | 1978             |                      | CVCL_7132                           |
| KCN         | Neuroblastoma           | SMS-KCN               | male   | amplified     | Dx            | 1979             | paired               | CVCL_7133                           |
| KCNR        | Neuroblastoma           | SMS-KCNR              | male   | amplified     | PD            | 1979             |                      | CVCL_7134                           |

**Supplemental Table S2. Human cell lines used in this study.** Sample name is used for abbreviating graphs and corresponds to a unique cell line designation. NB cells were derived from tumors of HR patients at dates provided and are classified by sex, *MYCN* status, and therapy phase (Dx = at diagnosis; PD = during progressive disease). Paired NB cell sets were isolated from a single patient at diagnosis and during progressive disease. All cell lines were grown in RPMI media supplemented with 10% fetal bovine serum and were tested for mycoplasma before and during use.

| Structure                             | Common name                   | $\Delta$ (DB location)   | Component       | NHF          | BE1          | BE2          | C15          | C20          | KAN          | KANR         | KCN          | KCNR         |
|---------------------------------------|-------------------------------|--------------------------|-----------------|--------------|--------------|--------------|--------------|--------------|--------------|--------------|--------------|--------------|
| <b>Saturated</b>                      |                               |                          |                 |              |              |              |              |              |              |              |              |              |
| SFA                                   | myristic (MA)                 | —                        | 14:0            | 1.74 ± 0.10  | 1.49 ± 0.01  | 1.96 ± 0.05  | 2.32 ± 0.08  | 1.87 ± 0.05  | 2.33 ± 0.25  | 2.18 ± 0.31  | 3.29 ± 0.07  | 2.83 ± 0.01  |
| SFA                                   | palmitic (PA)                 | —                        | 16:0            | 20.90 ± 0.37 | 19.12 ± 0.08 | 20.63 ± 0.06 | 24.22 ± 0.21 | 25.78 ± 0.07 | 26.74 ± 0.08 | 28.22 ± 0.90 | 23.09 ± 0.15 | 24.51 ± 0.25 |
| SFA                                   | margaric                      | —                        | 17:0            | 0.75 ± 0.00  | 0.11 ± 0.02  | 0.14 ± 0.01  | 0.07 ± 0.01  | 0.14 ± 0.01  | 0.07 ± 0.03  | 0.19 ± 0.05  | 0.11 ± 0.04  | 0.17 ± 0.03  |
| SFA                                   | stearic (SA)                  | —                        | 18:0            | 15.97 ± 0.35 | 16.96 ± 0.27 | 12.56 ± 0.11 | 12.37 ± 0.07 | 11.31 ± 0.04 | 10.52 ± 0.15 | 10.32 ± 0.49 | 14.02 ± 0.02 | 13.30 ± 0.01 |
| SFA                                   | arachidic                     | —                        | 20:0            | 0.13 ± 0.00  | 0.12 ± 0.00  | 0.15 ± 0.02  | 0.16 ± 0.07  | 0.13 ± 0.02  | 0.20 ± 0.06  | 0.27 ± 0.08  | 0.09 ± 0.02  | 0.09 ± 0.02  |
| SFA                                   | behenic                       | —                        | 22:0            | 0.45 ± 0.02  | 0.03 ± 0.02  | 0.15 ± 0.05  | 0.11 ± 0.04  | 0.27 ± 0.02  | 0.14 ± 0.00  | 0.07 ± 0.01  | 0.02 ± 0.00  | 0.09 ± 0.05  |
| SFA                                   | lignoceric                    | —                        | 24:0            | 1.05 ± 0.01  | 0.04 ± 0.02  | 0.12 ± 0.00  | 0.17 ± 0.02  | 0.16 ± 0.06  | 0.07 ± 0.01  | 0.07 ± 0.01  | 0.06 ± 0.04  | 0.02 ± 0.00  |
| <b>Omega-7 (<math>\omega</math>7)</b> |                               |                          |                 |              |              |              |              |              |              |              |              |              |
| MUFA                                  | palmitoleic                   | $\Delta$ 9               | 16:1 $\omega$ 7 | 1.96 ± 0.04  | 0.59 ± 0.03  | 2.63 ± 0.01  | 2.43 ± 0.10  | 1.73 ± 0.25  | 1.79 ± 0.09  | 2.03 ± 0.02  | 1.53 ± 0.01  | 2.15 ± 0.12  |
| MUFA                                  | asclepic                      | $\Delta$ 11              | 18:1 $\omega$ 7 | 6.82 ± 0.01  | 7.08 ± 0.12  | 9.22 ± 0.08  | 7.54 ± 0.04  | 7.56 ± 0.03  | 8.91 ± 0.03  | 9.31 ± 0.27  | 8.56 ± 0.00  | 7.63 ± 0.10  |
| <b>Omega-9 (<math>\omega</math>9)</b> |                               |                          |                 |              |              |              |              |              |              |              |              |              |
| MUFA                                  | cis-hexadecenoic              | $\Delta$ 7               | 16:1 $\omega$ 9 | 2.37 ± 0.05  | 3.57 ± 0.00  | 3.75 ± 0.02  | 6.26 ± 0.02  | 5.40 ± 0.17  | 5.32 ± 0.01  | 4.77 ± 0.19  | 4.64 ± 0.02  | 4.83 ± 0.01  |
| MUFA                                  | oleic (OA)                    | $\Delta$ 9               | 18:1 $\omega$ 9 | 20.98 ± 0.15 | 29.18 ± 0.27 | 32.42 ± 0.10 | 26.33 ± 0.08 | 24.31 ± 0.06 | 22.34 ± 0.05 | 22.03 ± 0.41 | 21.28 ± 0.19 | 26.24 ± 0.16 |
| MUFA                                  | gondoic                       | $\Delta$ 11              | 20:1 $\omega$ 9 | 0.28 ± 0.03  | 1.35 ± 0.00  | 1.58 ± 0.02  | 1.39 ± 0.06  | 1.21 ± 0.09  | 1.45 ± 0.04  | 0.88 ± 0.07  | 1.12 ± 0.02  | 0.73 ± 0.03  |
| PUFA                                  | 8,11-eicosadienoic            | $\Delta$ 8,11            | 20:2 $\omega$ 9 | 0.23 ± 0.03  | 0.11 ± 0.02  | 0.36 ± 0.03  | 0.85 ± 0.03  | 0.60 ± 0.04  | 0.12 ± 0.07  | 0.08 ± 0.00  | 0.24 ± 0.04  | 0.32 ± 0.06  |
| HUFA                                  | 5,8,11-eicosatrienoic (Mead)  | $\Delta$ 5,8,11          | 20:3 $\omega$ 9 | 0.17 ± 0.01  | 5.36 ± 0.22  | 3.80 ± 0.10  | 5.23 ± 0.04  | 4.72 ± 0.02  | 4.91 ± 0.00  | 2.15 ± 0.44  | 3.93 ± 0.08  | 2.54 ± 0.04  |
| MUFA                                  | erucic                        | $\Delta$ 13              | 22:1 $\omega$ 9 | 0.12 ± 0.03  | 0.07 ± 0.02  | 0.18 ± 0.01  | 0.20 ± 0.00  | 0.21 ± 0.05  | 0.10 ± 0.01  | 0.13 ± 0.01  | 0.05 ± 0.02  | 0.18 ± 0.05  |
| HUFA                                  | 7,10,13-docosatrienoic (DTrA) | $\Delta$ 7,10,13         | 22:3 $\omega$ 9 | 0.14 ± 0.01  | 5.96 ± 0.16  | 3.76 ± 0.08  | 3.76 ± 0.02  | 4.05 ± 0.01  | 5.75 ± 0.23  | 2.75 ± 0.43  | 5.42 ± 0.09  | 2.13 ± 0.07  |
| MUFA                                  | nervonic                      | $\Delta$ 15              | 24:1 $\omega$ 9 | 1.61 ± 0.01  | 0.10 ± 0.08  | 0.68 ± 0.03  | 0.59 ± 0.02  | 0.85 ± 0.02  | 0.31 ± 0.04  | 0.21 ± 0.03  | 0.12 ± 0.04  | 0.24 ± 0.02  |
| <b>Omega-6 (<math>\omega</math>6)</b> |                               |                          |                 |              |              |              |              |              |              |              |              |              |
| PUFA                                  | linoleic (LA)                 | $\Delta$ 9,12            | 18:2 $\omega$ 6 | 2.11 ± 0.05  | 0.03 ± 0.00  | 0.39 ± 0.44  | 0.13 ± 0.01  | 0.23 ± 0.00  | 0.32 ± 0.25  | 0.13 ± 0.07  | 0.08 ± 0.03  | 0.07 ± 0.00  |
| HUFA                                  | gamma-linolenic (GLA)         | $\Delta$ 6,9,12          | 18:3 $\omega$ 6 | 0.30 ± 0.13  | 0.00 ± 0.00  | 0.00 ± 0.00  | 0.00 ± 0.00  | 0.00 ± 0.00  | 0.00 ± 0.00  | 0.00 ± 0.00  | 0.00 ± 0.00  | 0.00 ± 0.00  |
| PUFA                                  | 11,14-eicosadienoic           | $\Delta$ 11,14           | 20:2 $\omega$ 6 | 0.09 ± 0.02  | 0.20 ± 0.06  | 0.69 ± 0.06  | 0.74 ± 0.02  | 0.54 ± 0.02  | 0.51 ± 0.02  | 0.18 ± 0.09  | 0.31 ± 0.02  | 0.07 ± 0.02  |
| HUFA                                  | sciadonic                     | $\Delta$ 5,11,14         | 20:3 $\omega$ 6 | 0.00 ± 0.00  | 0.00 ± 0.00  | 0.00 ± 0.00  | 0.00 ± 0.00  | 0.00 ± 0.00  | 0.00 ± 0.00  | 0.00 ± 0.00  | 0.00 ± 0.00  | 0.00 ± 0.00  |
| HUFA                                  | dihomo-gamma-linolenic (DGLA) | $\Delta$ 8,11,14         | 20:3 $\omega$ 6 | 1.90 ± 0.05  | 0.02 ± 0.02  | 0.11 ± 0.02  | 0.30 ± 0.04  | 0.47 ± 0.01  | 0.10 ± 0.05  | 0.18 ± 0.06  | 0.09 ± 0.01  | 0.12 ± 0.05  |
| HUFA                                  | arachidonic (ARA)             | $\Delta$ 5,8,11,14       | 20:4 $\omega$ 6 | 10.28 ± 0.44 | 3.62 ± 0.02  | 2.35 ± 0.01  | 2.72 ± 0.02  | 4.67 ± 0.02  | 3.90 ± 0.01  | 7.64 ± 0.58  | 5.04 ± 0.06  | 5.85 ± 0.02  |
| HUFA                                  | adrenic AdrA                  | $\Delta$ 7,10,13,16      | 22:4 $\omega$ 6 | 3.25 ± 0.07  | 2.13 ± 0.12  | 0.97 ± 0.11  | 0.79 ± 0.04  | 1.22 ± 0.06  | 0.71 ± 0.02  | 2.03 ± 0.16  | 3.46 ± 0.05  | 2.59 ± 0.06  |
| HUFA                                  | osbond                        | $\Delta$ 4,7,10,13,16    | 22:5 $\omega$ 6 | 0.83 ± 0.03  | 0.51 ± 0.08  | 0.09 ± 0.01  | 0.20 ± 0.03  | 0.59 ± 0.03  | 1.55 ± 0.07  | 1.71 ± 0.18  | 0.34 ± 0.02  | 0.42 ± 0.04  |
| <b>Omega-3 (<math>\omega</math>3)</b> |                               |                          |                 |              |              |              |              |              |              |              |              |              |
| HUFA                                  | alpha-linolenic (ALA)         | $\Delta$ 9,12,15         | 18:3 $\omega$ 3 | 0.36 ± 0.06  | 0.00 ± 0.00  | 0.00 ± 0.00  | 0.00 ± 0.00  | 0.00 ± 0.00  | 0.00 ± 0.00  | 0.00 ± 0.00  | 0.00 ± 0.00  | 0.00 ± 0.00  |
| HUFA                                  | eicosapentaenoic (EPA)        | $\Delta$ 5,8,11,14,17    | 20:5 $\omega$ 3 | 0.07 ± 0.05  | 0.00 ± 0.00  | 0.00 ± 0.00  | 0.00 ± 0.00  | 0.00 ± 0.00  | 0.00 ± 0.00  | 0.00 ± 0.00  | 0.00 ± 0.00  | 0.00 ± 0.00  |
| HUFA                                  | docosapentaenoic (DPA)        | $\Delta$ 7,10,13,16,19   | 22:5 $\omega$ 3 | 2.51 ± 0.13  | 0.91 ± 0.03  | 0.59 ± 0.03  | 0.22 ± 0.01  | 0.46 ± 0.00  | 0.18 ± 0.08  | 0.46 ± 0.04  | 1.37 ± 0.04  | 1.22 ± 0.13  |
| HUFA                                  | docosahexaenoic (DHA)         | $\Delta$ 4,7,10,13,16,19 | 22:6 $\omega$ 3 | 2.67 ± 0.19  | 1.35 ± 0.02  | 0.71 ± 0.01  | 0.90 ± 0.04  | 1.52 ± 0.05  | 1.66 ± 0.14  | 2.01 ± 0.14  | 1.73 ± 0.02  | 1.68 ± 0.12  |

**Supplemental Table S3. NB cell line lipid levels master table.** Fatty acids are ordered by structure and increasing component size. Numerical levels represent percent weight of a given fatty acid per overall weight (w/w, %) as determined by GC/MS (three biological replicates per cell line).

| Gene   | Gene ID | Ensembl ID        | Ensembl length (nt) | RefSeq ID      | RefSeq length (nt) |
|--------|---------|-------------------|---------------------|----------------|--------------------|
| ACACA  | 31      | ENST00000353139.5 | 2349                | NM_198834.3    | 2324               |
| FASN   | 2194    | ENST00000306749.2 | 2245                | NM_004104.5    | 805                |
| ELOVL6 | 79071   | ENST00000394607.3 | 5492                | NM_024090.3    | 5492               |
| SCD    | 6319    | ENST00000370355.2 | 3901                | NM_005063.5    | 3893               |
| FADS2  | 9415    | ENST00000257261.6 | 2890                | NM_004265.4    | 1665               |
| ELOVL5 | 60481   | ENST00000370918.4 | 1741                | NM_021814.5    | 1723               |
| FADS1  | 3992    | ENST00000350997.7 | 5184                | NM_013402.7    | 2784               |
| ELOVL2 | 54898   | ENST00000354666.3 | 3027                | NM_017770.4    | 3022               |
| MYCN   | 4613    | ENST00000281043.3 | 917                 | NM_001293228.2 | 907                |
| MYC    | 4609    | ENST00000377970.2 | 1997                | NM_002467.6    | 1993               |
| MYCL   | 4610    | ENST00000397332.2 | 1948                | NM_001033081.3 | 1944               |
| SDHA   | 6389    | ENST00000264932.6 | 1269                | NM_004168.4    | 662                |
| ACTB   | 60      | ENST00000331789.5 | 613                 | NM_001101.5    | 600                |
| GAPDH  | 2597    | ENST00000229239.5 | 224                 | NM_002046.7    | 201                |
| DLK1   | 8788    | ENST00000341267.4 | 3326                | NM_003836.7    | 3328               |
| ITGAV  | 3685    | ENST00000261023.3 | 3610                | NM_002210.5    | 3609               |
| PTEN   | 5728    | ENST00000371953.3 | 6458                | NM_000314.8    | 6458               |

**Supplemental Table S4. Table of human genes used to identify potential 3' UTR miRNA binding.** The Ensemble ID and 3'UTR length are used to determine miRNA binding sites by TargetScan. Listed miRNA sites in *Table 1* were modified by limiting those sites to the RefSeq ID sequence and length, which are often shorter than the Ensembl sequences.

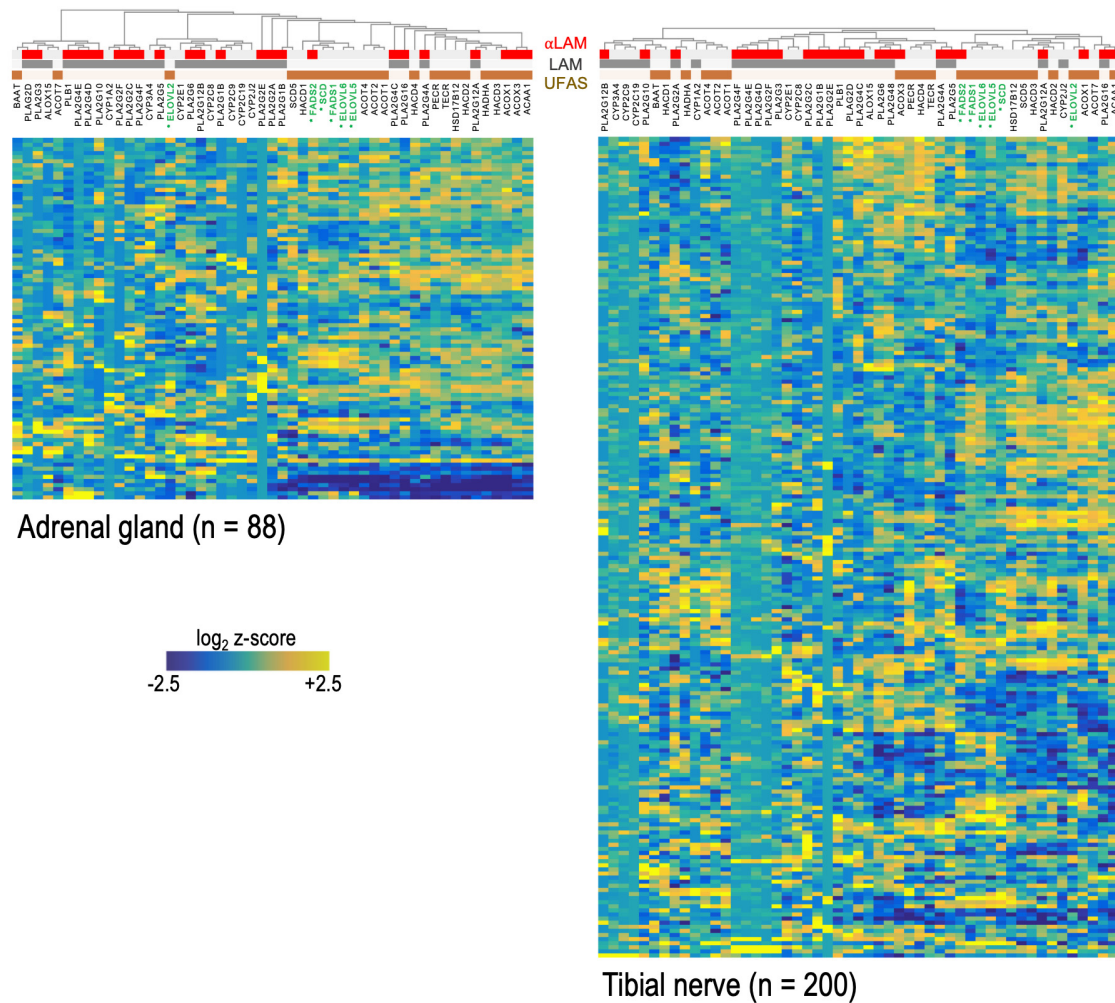

**Supplemental Figure S4. Expression patterns in normal human tissues by KEGG gene set analysis.** Heatmap of  $\alpha$ -linolenic acid metabolism ( $\alpha$ -LAM), linoleic acid metabolism (LAM), and unsaturated fatty acid synthesis (UFAS) gene expression comparing adrenal gland cells and tibial nerve cells to other body tissues. U/FAS pathway genes from *figure 1b* are titled in green and contain asterisks (\*). Genes associated with  $\alpha$ -LAM, LAM and U/FAS gene sets are identified by clustered red, grey, and brown bars, respectively. Expression data is presented as normalized values (log<sub>2</sub> z-scores). (*GTEX Portal v8, protein coding*)



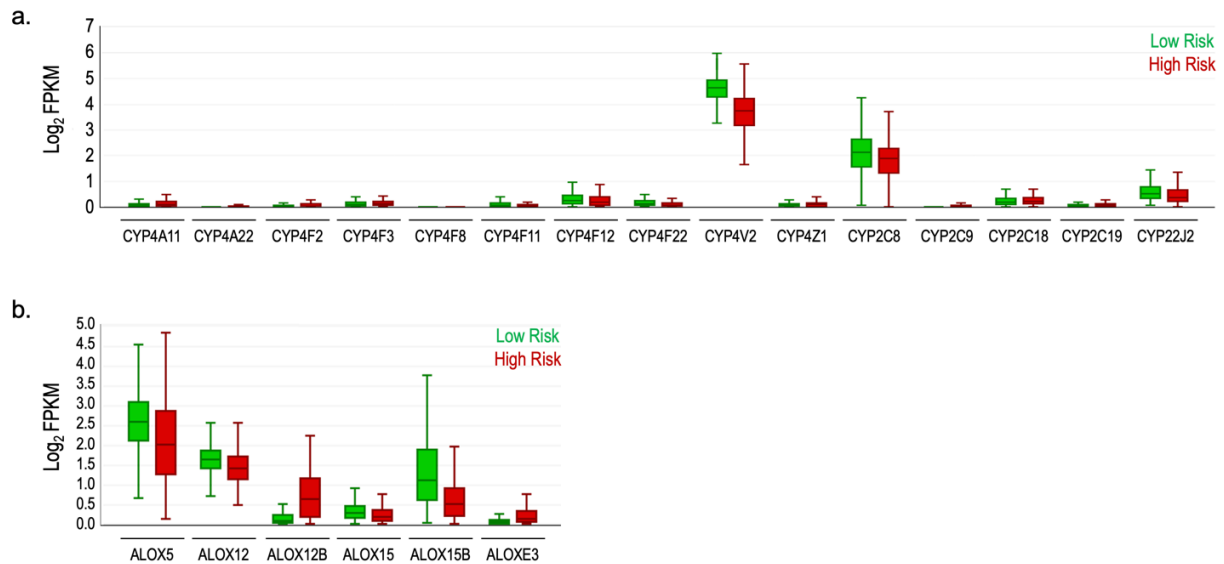

**Supplemental Figure S5. Expression level comparisons of CYP450 and LOX genes in low-risk (LR) and high-risk (HR) NB patients. a-b.** Expression levels of the (a) the fifteen human  $\omega$ 6 hydroxylating CYP450 and (b) the six human lipoxygenase (ALOX) genes in LR (green bars, n = 270) and HR (red bars, n = 171) NB. Gene expression is displayed for stage 1-4 NB patients by log<sub>2</sub> FPKM values. (*GEO accession GSE62564*)

| Figure  | Key Word(s)            | GEO Accession | Authors   | PMID              | R2 Internal Identifier              |
|---------|------------------------|---------------|-----------|-------------------|-------------------------------------|
| 2a      | NB                     | GSE62564      | SEQC (Su) | 25633159          | ps_avgpres_gse49710geo498_ag44kcwlf |
| 2b      | NB                     | GSE62564      | SEQC (Su) | 25633159          | ps_avgpres_gse49710geo498_ag44kcwlf |
| 3a      | NB                     | GSE62564      | SEQC (Su) | 25633159          | ps_avgpres_gse49710geo498_ag44kcwlf |
| 3b      | NB                     | GSE62564      | SEQC (Su) | 25633159          | ps_avgpres_gse49710geo498_ag44kcwlf |
| 4b      | <i>miR-22</i>          | GSE83805      | Bersani   | 27569217          | n/a                                 |
| 4b      | <i>miR-22</i>          | GSE92599      | Inwood    | 28987030          | n/a                                 |
| 4b      | <i>LIN28A (let-7)</i>  | GSE53038      | Kim       | 25479749          | n/a                                 |
| 4b      | <i>let-7</i>           | GSE218501     | n/a       | not yet published | n/a                                 |
| 4b      | <i>miR-124</i>         | GSE67327      | Shields   | 26655797          | n/a                                 |
| 4c      | NB                     | GSE62564      | SEQC (Su) | 25633159          | ps_avgpres_gse49710geo498_ag44kcwlf |
| 5a      | Adrenal Gland          | GSE3526       | Various   | N/A               | ps_avgpres_adrenalglandns13_u133p2  |
| 5a      | Adrenal Gland          | GSE7307       | Various   | N/A               | ps_avgpres_adrenalglandns13_u133p2  |
| 5a      | Adrenal Gland          | GSE8514       | Various   | N/A               | ps_avgpres_adrenalglandns13_u133p2  |
| 5a      | Trunk Neural Crest     | GSE14340      | Etchevers | 19666486          | ps_avgpres_gse14340geo5_u133p2      |
| 5a      | NB                     | GSE16476      | Versteeg  | 22367537          | ps_avgpres_nbadam88_u133p2          |
| 5a      | NB                     | GSE13136      | Lastowska | 17533364          | ps_avgpres_nblastowska30_u133p2     |
| 5a      | NB                     | GSE12460      | Delattre  | 18553563          | ps_avgpres_nbdelatre64_u133p2       |
| 5b      | NB                     | GSE62564      | SEQC (Su) | 25633159          | ps_avgpres_gse49710geo498_ag44kcwlf |
| 5c      | <i>MYC</i> (induction) | GSE14302      | Chang     | 19211792          | n/a                                 |
| 5d      | <i>MYCN</i> (JQ1)      | GSE107707     | Iniguez   | 30537514          | ps_avgpres_gse107707geo30_gpl18573b |
| 5e      | NB                     | GSE62564      | SEQC (Su) | 25633159          | ps_avgpres_gse49710geo498_ag44kcwlf |
| 6b      | NB                     | GSE62564      | SEQC (Su) | 25633159          | ps_avgpres_gse49710geo498_ag44kcwlf |
| 7       | NB                     | GSE62564      | SEQC (Su) | 25633159          | ps_avgpres_gse49710geo498_ag44kcwlf |
| Sup S4a | NB                     | GSE62564      | SEQC (Su) | 25633159          | ps_avgpres_gse49710geo498_ag44kcwlf |
| Sup S4b | NB                     | GSE62564      | SEQC (Su) | 25633159          | ps_avgpres_gse49710geo498_ag44kcwlf |

**Supplemental Table S5. Publicly available GSE data sets used in this study.** Data sets used for secondary analysis are organized by figure location and key words. Gene Expression Omnibus (GSE) accessions, study authors, PubMed Identifier (PMID), and R2 database internal identifiers are provided.
